# Supplementary material
Source: publisher figshare collection journal article supplement (https://acs.figshare.com/ndownloader/files/26665503)
Supplement: Supplementary file 1 [file 26665503]

## Supplemental materials

### Evolution of Resistance to Phenazine Antibiotics in *Staphylococcus aureus* and its Role During Co-infection with *Pseudomonas aeruginosa*

Tongtong Fu<sup>1</sup>, Zhao Cai<sup>2</sup>, Zhuo Yue<sup>1</sup>, Hongfen Yang<sup>3</sup>, Bo Fang<sup>4</sup>, Xinwen Zhang<sup>1</sup>, Zheng Fan<sup>1</sup>, Xiaolei Pan<sup>1</sup>, Fan Yang<sup>1</sup>, Yongxin Jin<sup>1</sup>, Zhihui Cheng<sup>1</sup>, Wuihui Wu<sup>1</sup>, Baolin Sun<sup>4</sup>, Robert W. Huigens III<sup>3</sup>, Liang Yang<sup>2</sup>, Fang Bai<sup>1\*</sup>

<sup>1</sup> State Key Laboratory of Medicinal Chemical Biology, Key Laboratory of Molecular Microbiology and Technology of the Ministry of Education, College of Life Sciences, Nankai University, Tianjin, China.

<sup>2</sup> School of Medicine, Southern University of Science and Technology (SUSTec), Shenzhen, China.

<sup>3</sup> Department of Medicinal Chemistry & Center for Natural Products, Drug Discovery and Development (CNPd3), College of Pharmacy, University of Florida, Gainesville, Florida 32610.

<sup>4</sup> School of Life Sciences and Medical Center, University of Science and Technology of China, Hefei, Anhui 230027, China.

\*, Corresponding authors: Fang Bai ([baifang1122@nankai.edu.cn](mailto:baifang1122@nankai.edu.cn))

#### This file contains

|                                    |         |
|------------------------------------|---------|
| 1) Methods.....                    | S2-S4   |
| 2) Supplementary Table S1-S7.....  | S5-S9   |
| 3) Supplementary Figure S1-S6..... | S10-S12 |
| 4) Reference.....                  | S12-S13 |

## Methods

**Genomic sequencing and reference mapping of HP-22 resistant mutants.** Three isolates evolved in MHB only and three HP-22 resistant isolates were first streaked on MHA plates and incubated at 37°C for 16 h. Single colonies were picked and grown in LB at 37°C, 200 rpm for 16 h. Genomic DNA of the *S. aureus* strains was purified using QIAamp DNA Mini Kit (Qiagen, Venlo, The Netherlands) and sequenced on an Illumina (San Diego, CA, USA) MiSeq V3 platform. Nucleotide differences were generated from the CLC Genomics Workbench 8.0 (CLC bio, Aarhus, Denmark). Briefly, adapters and low quality reads were trimmed. Paired-end reads in FASTQ format for HP-resistance and media control (MC) genomes were mapped against the *S. aureus* NCTC8325 genome (NC\_007795). The mappings of HPR mutants were compared with the MC isolates, and variants were detected using the quality based variant detection method with the required frequency of 35%.

**Quantification of intracellular drug concentration by LC-MS/MS.** Overnight cultures of different *S. aureus* strains were diluted into fresh MHB medium and grown to OD<sub>600</sub>=1.0. Around 1×10<sup>9</sup> CFU of each culture was treated with 0.04 µg/mL (1×MIC), 0.4 µg/mL (10×MIC) of HP-22, and 14 µg/mL (1×MIC) of PYO, respectively, for 30 min. The treated bacterial cells were collected by centrifugation and washed 3 times using phosphate-buffered saline (PBS) to remove extracellular drug residue. In all cases cell pellets were resuspended in PBS. The number of live bacteria (CFU) was determined by serial dilution and plating as previously described<sup>1</sup>. Zirconia beads (0.1 mm in diameter) were added to cell pellets for cell breakage by beating. HP-22 was extracted with methanol, PYO was extracted with chloroform:methanol (1:1 v/v), then rotary evaporated to dryness and redissolved in acetonitrile. Drug concentration was determined by a liquid chromatography coupled with an atmospheric pressure chemical ionization-tandem mass spectrometry (APGC-MS/MS, Waters Corporation, UK). An Agilent Zorbax SB-C8 column (2.1 by 30 mm; particle size, 3.5 µm) was used; HP-treated samples were analyzed by the following gradient method using Milli-Q deionized water and acetonitrile mobile phases at a flow rate of 300 µL/min: mobile phase initial conditions were 90:10 water:acetonitrile, which changed to 10:90 at 1 min, then reversed to original conditions at 4 min and held to 5 min when the

equilibrium was reached. The data was acquired by Agilent UHD Q-TOF 6540 system. The mass analysis was performed on the negative ion mode; the MS acquisition parameter used was as follows: capillary voltage 2.5 KV, gas temperature 150°C, drying gas 2.5 L/min and nebulizer 7 bar. PYO-treated samples were analyzed by the following gradient method using Milli-Q deionized water with 0.1% formic acid and acetonitrile mobile phases at a flow rate of 400  $\mu$ L/min: mobile phase initial conditions were 80:20 water with 0.1% formic acid:acetonitrile, which changed to 40:60 at 1 min, then reversed to original conditions at 3 min and held to 4 min when the equilibrium was reached. The data was acquired by Agilent UHD Q-TOF 6540 system. The mass analysis was performed on the positive ion mode; the MS acquisition parameter used was as follows: capillary voltage 3.0 KV, gas temperature 300°C, drying gas 2.5 L/min and nebulizer 7 bar. The drug concentration (fg/CFU) was determined by comparing the integrated peak area to a calibration curve, and divided by the corresponding CFU of living cells.

**Homology modeling and molecular docking.** Homology modeling was conducted in MOE v2015.1001 (Chemical Computing Group Inc.). Template crystal structures were identified through BLAST and downloaded from RCSB Protein Data Bank (PDB ID: 3KKC). The protonation state of the protein and the orientation of the hydrogens were optimized by LigX at the pH of 7 and the temperature of 300 K. First, the target sequence was aligned to the template sequence, and ten independent intermediate models were built. These different homology models were the result of the permutational selection of different loop candidates and side-chain rotamers. Then, the intermediate model which scored best according to the GB/VI scoring function was chosen as the final model, and was subjected to further energy minimization using the AMBER10:EHT force field. The 2D structures of the compound HP-22 was drawn in ChemBioDraw 2014 and converted to 3D structure in MOE through energy minimization. Prior to docking, the force field of AMBER10:EHT and the implicit solvation model of Reaction Field (R-field) were selected. MOE-Dock was used for molecular docking simulations of the HP-22 with TetR21<sup>WT</sup> and TetR21<sup>R116C</sup>. The docking workflow followed the “induced fit” protocol, in which the side chains of the receptor pocket were allowed to move according to ligand conformations, with a constraint on their positions. The weight used for tethering side chain atoms to their original positions was 10. For each ligand, all docked poses of which were ranked

by London dG scoring first, then a force field refinement was carried out on the top 20 poses followed by a rescoring of GBVI/WSA dG. The conformations with the lowest free energies of binding were selected as the best (probable) binding modes. Molecular graphics were generated by PyMOL.

## Supplementary Tables

**Table S1.** Common mutations in 3 HPR isolates.

| Gene id<br>in <i>S. aureus</i> MW2<br>(GenBank:<br>BA000033.2) | Gene id<br>in reference<br>genome <sup>a</sup> | Region in<br>reference genome | Mutation        | Mutation type | Caused amino acid<br>change <sup>b</sup> | Product                             |
|----------------------------------------------------------------|------------------------------------------------|-------------------------------|-----------------|---------------|------------------------------------------|-------------------------------------|
| MW0206                                                         | SAOUHSC_00192                                  | 213558                        | C > A           | SNV           | Tyr609>Stop codon                        | Staphylocoagulase                   |
| MW0273                                                         | SAOUHSC_00274                                  | 292225..292226                | GA > AG         | MNV           | Asp59Ser                                 | Repetitive hypothetical<br>protein  |
|                                                                |                                                | 292228                        | A > G           | SNV           | Ile60Val                                 |                                     |
|                                                                |                                                | 292230..292233                | ACCT > GATA     | MNV           | Ile60Pro61>Met-Ile                       |                                     |
|                                                                |                                                | 292237                        | G > A           | SNV           | Asp63Asn                                 |                                     |
|                                                                |                                                | 292241..292242                | GC > AT         | MNV           | Cys64Tyr                                 |                                     |
|                                                                |                                                | 292246                        | G > A           | SNV           | Val66Ile                                 |                                     |
|                                                                |                                                | 292251..292253                | AAA > G         | Replacement   | Lys68fs                                  |                                     |
|                                                                |                                                | 292257^292258                 | - > C           | Insertion     | Ile70fs                                  |                                     |
|                                                                |                                                | 292259..292260                | TT > GGA        | Replacement   | Ile70fs                                  |                                     |
|                                                                |                                                | 292273..292274                | TG > -          | Deletion      | Trp75fs                                  |                                     |
|                                                                |                                                | 292277                        | T > A           | SNV           | Phe76Tyr                                 |                                     |
|                                                                |                                                | 292280                        | A > TG          | Replacement   | Lys77fs                                  |                                     |
|                                                                |                                                | 292285                        | T > GC          | Replacement   | Tyr79fs                                  |                                     |
|                                                                |                                                | 292288                        | C > -           | Deletion      | Arg80fs                                  |                                     |
|                                                                |                                                | 292291..292293                | ATG > TCAA      | Replacement   | Met81fs                                  |                                     |
| MW0278                                                         | SAOUHSC_00277                                  | 293900..293901                | GC > AA         | MNV           | Ser106Lys                                | Hypothetical protein                |
| MW0517                                                         | SAOUHSC_00545                                  | 554725                        | C > A           | SNV           | Asp1207Glu                               | Fibrinogen-binding<br>protein SdrD  |
| MW0764                                                         | SAOUHSC_00812                                  | 794856                        | A > -           | Deletion      | Asp624fs                                 | Clumping factor ClfA                |
|                                                                |                                                | 795288                        | C > A           | SNV           | Ala768Glu                                |                                     |
| MW1681                                                         | SAOUHSC_01854                                  | 1760735                       | G > T           | SNV           | Ala150Glu                                | Hypothetical protein                |
| MW1742                                                         | SAOUHSC_01923                                  | 1830624                       | T > A           | SNV           | Asn122Ile                                | Hypothetical protein                |
| <b>MW2297</b>                                                  | <b>SAOUHSC_02659</b>                           | <b>2443574</b>                | <b>C &gt; T</b> | <b>SNV</b>    | <b>Arg116Cys</b>                         | <b>TetR21</b>                       |
| MW2400                                                         | SAOUHSC_02775                                  | 2552860                       | T > G           | SNV           | Thr58Pro                                 | Hypothetical protein                |
| MW2406                                                         | SAOUHSC_02789                                  | 2561061..2561062              | TT > CC         | MNV           | Lys164Glu                                | Hypothetical protein                |
| MW2421                                                         | SAOUHSC_02803                                  | 2583134                       | A > C           | SNV           | Leu413Val                                | Fibronectin binding<br>protein FnbA |
|                                                                |                                                | 2583136                       | T > C           | SNV           | Asn412Ser                                |                                     |
|                                                                |                                                | 2583141                       | A > T           | SNV           | Asn410Lys                                |                                     |

<sup>a</sup> Reference mapping against the *S. aureus* NCTC 8325 genome (GenBank accession No. NC\_007795). <sup>b</sup> SNV, single nucleotide variation; MNV, Multi-nucleotide variation; fs, frame shifting.

**Table S2.** Susceptibility of *S. aureus* strains to antibiotics and chemical compounds

| Antibiotic/chemical            | MIC (µg/mL) for <i>S. aureus</i> strains |                  |              |                   |        |              |
|--------------------------------|------------------------------------------|------------------|--------------|-------------------|--------|--------------|
|                                | MW2                                      | MW2Δ <i>hprS</i> | MW21 (R116C) | MW21Δ <i>hprS</i> | RN4220 | RN21 (R116C) |
| Chloramphenicol                | 0.63                                     | 0.63             | 0.63         | 0.63              | 1.25   | 1.25         |
| Ciprofloxacin                  | 0.63                                     | 0.63             | 0.63         | 0.63              | 0.63   | 0.63         |
| Daptomycin                     | 0.63                                     | 0.63             | 0.63         | 0.63              | 0.31   | 0.31         |
| Erythromycin                   | 0.63                                     | 0.63             | 0.63         | 0.63              | 0.63   | 0.63         |
| Linezolid                      | 12.5                                     | 12.5             | 12.5         | 12.5              | 6.25   | 6.25         |
| Ofloxacin                      | 0.39                                     | 0.39             | 0.31         | 0.39              | 1.25   | 1.25         |
| Tetracycline                   | 15.6                                     | 15.6             | 15.6         | 15.6              | 0.39   | 0.39         |
| Vancomycin                     | 0.625                                    | 0.625            | 0.625        | 0.625             | 1.25   | 1.25         |
| Acridavine                     | 15.6                                     | 15.6             | 15.6         | 15.6              | 15.6   | 15.6         |
| Pyocyanin (PYO)                | 14                                       | 14               | 14           | 7                 | 14     | 14           |
| Pyronin Y                      | 3.13                                     | 3.13             | 3.13         | 3.13              | 1.56   | 1.56         |
| Rhodamine 6G                   | 0.98                                     | 0.98             | 0.98         | 0.98              | 0.98   | 0.98         |
| Tetraphenylphosphonium bromide | 3.91                                     | 3.91             | 3.91         | 3.91              | 3.91   | 3.91         |

**Table S3.** Differential expression analysis by RNA-seq (MRSA MW21 vs wild-type MW2 strain) <sup>a</sup>

| Gene ID | Gene Name    | Product and description                                               | Regulation | Fold change  | P value   |
|---------|--------------|-----------------------------------------------------------------------|------------|--------------|-----------|
| MW2296  | <i>hprS</i>  | hypothetical protein                                                  | Up         | <b>24.26</b> | 6.47E-165 |
| MW2298  | <i>corA</i>  | divalent cation transporter                                           | Up         | 1.84         | 0.00011   |
| MW0770  | <i>cspC</i>  | cold-shock protein C                                                  | Up         | 1.8          | 1.27E-05  |
| MW2477  |              | hypothetical protein                                                  | Up         | 1.76         | 0.000924  |
| MW0779  | <i>argO</i>  | arginine exporter protein                                             | Up         | 1.7          | 0.000241  |
| MW1537  | <i>rpsT</i>  | 30S ribosomal protein S20                                             | Up         | 1.68         | 9.77E-05  |
| MW2327  | <i>yndB</i>  | glutathione S-transferase; activator of Hsp90 ATPase 1 family protein | Up         | 1.68         | 0.00204   |
| MW2394  | <i>cntK</i>  | diaminopimelate epimerase; staphylopine biosynthesis                  | Up         | 1.64         | 0.00448   |
| MW1380  | <i>SH3b</i>  | peptidoglycan hydrolase                                               | Up         | 1.63         | 0.00406   |
| MW1087  | <i>pyrF</i>  | orotidine 5'-phosphate decarboxylase                                  | Up         | 1.61         | 0.0018    |
| MW0837  | <i>yabR</i>  | nucleotidyltransferase                                                | Up         | 1.57         | 0.000541  |
| MW0135  | <i>cap8L</i> | capsular polysaccharide synthesis enzyme                              | Up         | 1.56         | 0.000519  |
| MW2392  | <i>cntM</i>  | staphylopine biosynthesis                                             | Up         | 1.52         | 0.017577  |
| MW1450  | <i>ypuF</i>  | predicted metal-dependent hydrolase                                   | Up         | 1.51         | 0.013523  |
| MW2034  |              | bacterial ATP synthase I                                              | Up         | 1.5          | 0.010327  |
| MW0706  |              | hypothetical protein                                                  | Down       | -1.53        | 0.00655   |
| MW1551  |              | hypothetical protein                                                  | Down       | -1.53        | 0.012343  |
| MW0516  | <i>sdrC</i>  | fibrinogen-binding protein                                            | Down       | -1.55        | 0.013364  |
| MW0553  |              | hypothetical protein                                                  | Down       | -1.55        | 0.008342  |
| MW1997  |              | hypothetical protein                                                  | Down       | -1.55        | 0.00971   |
| MW0554  |              | hypothetical protein                                                  | Down       | -1.56        | 0.003678  |

|        |             |                                                       |      |       |          |
|--------|-------------|-------------------------------------------------------|------|-------|----------|
| MW1980 |             | ketol-acid reductoisomerase                           | Down | -1.56 | 0.00617  |
| MW0801 |             | hypothetical protein                                  | Down | -1.57 | 0.005659 |
| MW1871 |             | hypothetical protein                                  | Down | -1.58 | 0.007702 |
| MW0517 | <i>sdrD</i> | fibrinogen-binding protein                            | Down | -1.59 | 0.001413 |
| MW0654 |             | hypothetical protein                                  | Down | -1.62 | 0.004028 |
| MW2125 |             | hypothetical protein                                  | Down | -1.65 | 0.004603 |
| MW0552 |             | hypothetical protein                                  | Down | -1.66 | 0.003412 |
| MW0561 |             | hypothetical protein                                  | Down | -1.69 | 0.001597 |
| MW0307 |             | hypothetical protein                                  | Down | -1.71 | 0.002415 |
| MW1325 | <i>norB</i> | multidrug efflux MFS transporter                      | Down | -1.71 | 7.48E-05 |
| MW0306 | <i>ulaA</i> | PTS system ascorbate-specific transporter subunit IIC | Down | -1.72 | 0.001137 |
| MW2433 |             | hypothetical protein                                  | Down | -1.72 | 0.000866 |
| MW1150 |             | hypothetical protein                                  | Down | -1.74 | 0.001719 |
| MW2094 |             | hypothetical protein                                  | Down | -1.76 | 0.001475 |
| MW0509 |             | hypothetical protein                                  | Down | -1.78 | 0.000252 |
| MW1057 |             | hypothetical protein                                  | Down | -1.78 | 0.001168 |
| MW1328 |             | alanine dehydrogenase                                 | Down | -1.79 | 1.42E-05 |
| MW1349 |             | hypothetical protein                                  | Down | -1.8  | 0.000907 |
| MW1327 |             | threonine dehydratase                                 | Down | -1.89 | 5.43E-05 |
| MW2395 |             | hypothetical protein                                  | Down | -1.9  | 0.000306 |
| MW1039 |             | hypothetical protein                                  | Down | -1.93 | 0.000118 |
| MW1326 |             | hypothetical protein                                  | Down | -1.95 | 7.54E-06 |
| MW2402 |             | hypothetical protein                                  | Down | -1.99 | 2.95E-05 |
| MW2280 |             | hypothetical protein                                  | Down | -2.2  | 2.86E-09 |
| MW0084 | <i>spa</i>  | protein A                                             | Down | -2.39 | 3.66E-07 |

<sup>a</sup> Including the genes that expression level  $\geq 1.5$ -fold change. Three biological replications of each strain were conducted in RNA-seq experiments.

**Table S4.** Top 5 identified HprS structural analogs in PDB (bacteria)

| Rank <sup>a</sup> | PDB Hit | TM-score <sup>b</sup> | IDEN <sup>c</sup> | Cov <sup>d</sup> | Describes                                                                      |
|-------------------|---------|-----------------------|-------------------|------------------|--------------------------------------------------------------------------------|
| 1                 | 5AYM    | 0.907                 | 0.107             | 0.922            | MFS iron transporter ferroportin BbFPN of <i>Bdellovibrio bacteriovorus</i>    |
| 2                 | 4GBY    | 0.775                 | 0.057             | 0.944            | MFS glucose transporter XylE of <i>Escherichia coli</i>                        |
| 3                 | 3O7Q    | 0.772                 | 0.075             | 0.882            | MFS fucose transporter FucP of <i>E. coli</i>                                  |
| 4                 | 3WDO    | 0.758                 | 0.084             | 0.896            | MFS drug efflux transporter YajR of <i>E. coli</i>                             |
| 5                 | 4M64    | 0.729                 | 0.071             | 0.922            | MFS Na <sup>+</sup> /melibiose symporter MelB of <i>Salmonella typhimurium</i> |

<sup>a</sup> Ranking of proteins is based on TM-score of the structural alignment between the query structure and known structures in the PDB library.

<sup>b</sup> TM-score is a measure of global structural similarity between query (HprS) and template protein.

<sup>c</sup> IDEN is the percentage sequence identity in the structurally aligned region.

<sup>d</sup> Cov represents the coverage of the alignment by TM-align and is equal to the number of structurally aligned residues divided by length of the query protein.

**Table S5.** Top 5 HprS homologous GO templates in PDB (bacteria)

| Rank <sup>a</sup> | Cscore <sup>GO</sup> | TM-score | IDEN | Cov  | PDB Hit | Describes                                                   |
|-------------------|----------------------|----------|------|------|---------|-------------------------------------------------------------|
| 1                 | 0.24                 | 0.7724   | 0.07 | 0.88 | 3O7Q    | MFS fucose transporter FucP of <i>E. coli</i>               |
| 2                 | 0.21                 | 0.6418   | 0.07 | 0.92 | 1PV6A   | MFS lactose permease of <i>E. coli</i>                      |
| 3                 | 0.21                 | 0.6148   | 0.04 | 0.82 | 2GFP    | MFS multidrug transporter EmrD of <i>E. coli</i>            |
| 4                 | 0.20                 | 0.6452   | 0.05 | 0.91 | 1PW4    | MFS glycerol-3-phosphate transporter GlpT of <i>E. coli</i> |
| 5                 | 0.20                 | 0.6243   | 0.08 | 0.84 | 2XUT    | MFS oligopeptide transporter of <i>E. coli</i>              |

<sup>a</sup> Ranking of proteins is based on Cscore<sup>GO</sup> value, which is a combined measure for evaluating global and local similarity between query and template protein. It's range is [0-1] and higher values indicate more confident predictions.

**Table S6.** Clinical isolates that harboring TetR21<sup>R116C</sup> (identical protein: WP\_000656764.1).

| <i>S. aureus</i> strain | NCBI Assembly   | Resource and Description                                                                                                                                                                                                                                          |
|-------------------------|-----------------|-------------------------------------------------------------------------------------------------------------------------------------------------------------------------------------------------------------------------------------------------------------------|
| A8115                   | GCF_000174535.1 | Isolated from patients with bloodstream infection who failed or had persistent infection while being treated with daptomycin <sup>2</sup> .                                                                                                                       |
| A8117                   | GCF_000175955.1 |                                                                                                                                                                                                                                                                   |
| 21236                   | GCF_000332665.1 | <i>Staphylococcus</i> isolates that aid in determining the genetic basis for drug resistance. This work was supported by the US National Institute of Allergy and Infectious Diseases (NIAID), Genome Sequencing Centers for Infectious Diseases (GSCID) program. |
| 502A                    | GCF_000597965.1 | Bacterial interference in treating staphylococcal disease in newborn babies during the 1960s and early 1970s. However, the practice was abandoned after several infections and a death were attributed to the 502A strain <sup>3</sup> .                          |
| ATCC 27217              | GCF_002088055.1 |                                                                                                                                                                                                                                                                   |
| NCTC10804               | GCF_900458375.1 |                                                                                                                                                                                                                                                                   |
| FDAARGOS_14 (NRS149)    | GCF_001018775.2 | Isolated from nares of nurse. Collected and sequenced by US Food and Drug Administration (FDA) <sup>4</sup> .                                                                                                                                                     |
| FDAARGOS_16             | GCF_001019355.2 | Isolated from clinical samples. Collected and sequenced by FDA.                                                                                                                                                                                                   |
| FDAARGOS_359            | GCF_002554295.1 |                                                                                                                                                                                                                                                                   |
| AW7                     | GCF_006861725.1 | Isolated from a patient with bacteremia in Switzerland in the 1980s and commonly used in treatment and virulence studies <sup>5</sup> .                                                                                                                           |

**Table S7.** Primers used in this study

| Name                    | Sequence (5'-3')                                    | Purpose                                         |
|-------------------------|-----------------------------------------------------|-------------------------------------------------|
| pCN51- <i>tetR21</i> -F | GGTCAATGTCTGAACGGTACCTTAATAGACAAATACACCCACATTGTTC   | Expression of <i>tetR21</i> in <i>S. aureus</i> |
| pCN51- <i>tetR21</i> -R | TCCTCTAGAGTCGACCTGCAGTTAAGTTAGTGAATCAAGGTTTGATTATG  |                                                 |
| pCN51- <i>hprS</i> -F   | CAGGTCGACTCTAGACTGCAGAAATATTCAACACATTGTCTAATAAGGAGG | Expression of <i>hprS</i> in <i>S. aureus</i>   |
| pCN51- <i>hprS</i> -R   | AGAATAGGCGCGCCTCTGCAGTTATGACGGCACTTCAGTACGTTT       |                                                 |
| pCN51- <i>corA</i> -F   | GGTCAATGTCTGAACCTGCAGGTAATACTCGCTTTTCCTAAATCCTTT    | Expression of <i>corA</i> in <i>S. aureus</i>   |
| pCN51- <i>corA</i> -R   | TCCTCTAGAGTCGACCTGCAGTTATAATTTCTGTTTACGCCATAAGAAA   |                                                 |
| <i>tetR21</i> -LIC-F    | CAGGGCGCCATGAAAGAAGATAGGCGAATTAG                    | LIC cloning                                     |
| <i>tetR21</i> -LIC-R    | GACCCGACGCGGTTAAGTTAGTGAATCAAGGTTTG                 |                                                 |
| <i>tetO</i> -F          | TTGTGTTATTGAACAATGTGG                               | SPR/EMSA                                        |
| <i>tetO</i> -R          | GTGTTGAATATTTTCGCATGTTGTC                           | SPR/EMSA                                        |



|                                    |                                                                              |                              |
|------------------------------------|------------------------------------------------------------------------------|------------------------------|
| half <i>tetO</i> -F                | GTGTATTGTTTATTCCAC                                                           | SPR                          |
| <i>RtetR21</i> -UP-F- <i>EcoRI</i> | CACTCATCGCAGTGCAGCGGAATTCATCACCCATACCAGTTAACACAGCT                           | <i>tetR21</i> point mutation |
| <i>RtetR21</i> -UP-R               | TGTAAGTAAATGTCCCTCTATTGATATCAGCGCTGTTGTTATGTC                                |                              |
| <i>RtetR21</i> -DN-F               | GACATAACAACACGCGCTGATATCAATAGAGGGACATTTTACTTACA                              |                              |
| <i>RtetR21</i> -DN-R- <i>Sall</i>  | AAGCTTGCATGCCTGCAGGTCGACTTCTGTTGTTTCGATGGCTTGG                               |                              |
| <i>RhprS</i> -UP-F- <i>EcoRI</i>   | CACTCATCGCAGTGCAGCGGAATTCACAGACATATCTCGCAATCCAGC                             | <i>hprS</i> deletion         |
| <i>RhprS</i> -UP-R                 | AGCAACTATGATTATCTTGGCTGTATCAAGTTTAGTTTCAGCT                                  |                              |
| <i>RhprS</i> -DN-F                 | AGCTGAAACTAACTTGATACAGCCAAGATAATCATAGTTGCT                                   |                              |
| <i>RhprS</i> -DN-R- <i>Sall</i>    | AAGCTTGCATGCCTGCAGGTCGACATCCATGACGCTGTATGATCTAATGG<br>T                      |                              |
| <i>RcorA</i> -UP-F- <i>EcoRI</i>   | CACTCATCGCAGTGCAGCGGAATTCAGACAAATACACCCACATTGTTC                             | <i>corA</i> deletion         |
| <i>RcorA</i> -UP-R                 | TGGTCATCAATTGGCAACGGCACCATGACGCTGTATGATCTAATGGTGT                            |                              |
| <i>RcorA</i> -DN-F                 | ACACCATTAGATCATAACGCGTCATGGTGCCGTTGCCAATTGATGACCA                            |                              |
| <i>RcorA</i> -DN-R- <i>Sall</i>    | AAGCTTGCATGCCTGCAGGTCGACATGCTTGATAGCAGCTTATATCTTAGC                          |                              |
| pOS1- <i>hprS</i> -PF              | CAAAGCCTTAAAGACGATCCGGGGAATTCCTCTAAATTATCATGAATATG<br>TTGGA                  | <i>lacZ</i> promoter assay   |
| pOS1- <i>hprS</i> -PR              | TCCCAGTCACGACGTTGTAAAACGACGGGATCCGGAAATATATTCATTTTA<br>TTAATTACCTCCTTATTAGAC | <i>lacZ</i> promoter assay   |
| pOS1- <i>tetR21</i> -PF            | CAAAGCCTTAAAGACGATCCGGGGAATTCCTCATAGCATCTTTTGAAAAGT<br>C                     | <i>lacZ</i> promoter assay   |
| pOS1- <i>tetR21</i> -PF            | TCCCAGTCACGACGTTGTAAAACGACGGGATCCGGTCGCCTATCTTCTTT<br>CAAAAATAAATCAACCT      | <i>lacZ</i> promoter assay   |
| Q- <i>tetR21</i> -F1               | CAATTGGAACGCACGAGTCA                                                         | qRT-PCR                      |
| Q- <i>tetR21</i> -R1               | TACATCTCTGGAACGCCTCC                                                         |                              |
| Q- <i>hprS</i> -F                  | CGTCGTGCAACATCGTATCA                                                         | qRT-PCR                      |
| Q- <i>hprS</i> -R                  | TAAGGCCACGAAACCAAGA                                                          |                              |
| Q- <i>corA</i> -F                  | AGTAGAACCAGACCGAGAAGA                                                        | qRT-PCR                      |
| Q- <i>corA</i> -R                  | TCAGCGTCACAACTGTTACG                                                         |                              |
| Q- <i>tet38</i> -F                 | ATGAATGTTGAATATTCTAA                                                         | qRT-PCR                      |
| Q- <i>tet38</i> -R                 | TGGCTACAGAAATCAAT                                                            |                              |
| Q- <i>lmrS</i> -F                  | CAGTATAAATCAATGGTCTA                                                         | qRT-PCR                      |
| Q- <i>lmrS</i> -R                  | CTTTATCTGCCTTGTTATCA                                                         |                              |
| Q-16S-F1                           | ACAAAGTGACAGGTGGTGCA                                                         | qRT-PCR                      |
| Q-16S-R1                           | GTTTGTCAACCGGCAGTCAAC                                                        |                              |

## Supplementary Figures

Figure S1

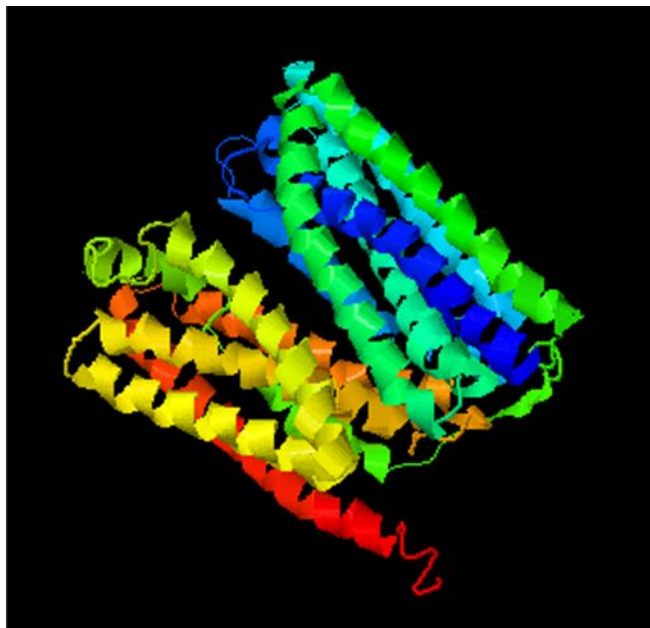

**Figure S1.** 3D structural model<sub>1</sub> of HprS generated by I-TASSER<sup>6-7</sup>. C-score=-1.36; Estimated TM-score = 0.55±0.15; Estimated RMSD = 10.1±4.6Å.

Figure S2

| Name            | Sites      |                |             | p-value |
|-----------------|------------|----------------|-------------|---------|
| LmrA_Bt         | GAATCAAGAT | AATAGACCAGTCAC | TATATTTTGTG | 4.25e-8 |
| QacR_Sa         | TTATAATCCT | TATAGACCGATCGC | ACGGTCTATA  | 2.48e-7 |
| TetR21_tet38    | TGGTTAGACA | AATAGACAAATCAC | TATACAAATA  | 7.33e-7 |
| MtrR_Ng         | GCCCTCGTCA | AACCGACCCGAAAC | GAAAACGCCA  | 1.96e-6 |
| AcrR_E.coli     | GTCAAAAGTT | AATAAACCCATTGC | TGCGTTTATA  | 2.11e-6 |
| * TetR21_MW2296 | TACATATTAT | AATAGACAACATGC | GAAATATTCA  | 3.30e-6 |
| EthR_Mtb        | ATGTCGACAC | TATCGACACGTAGT | AAGCTGCCAG  | 6.28e-6 |

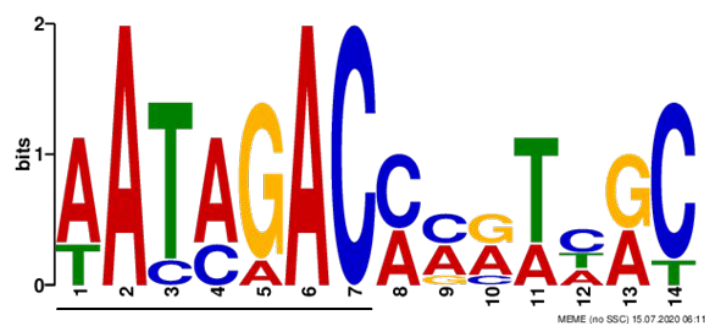

**Figure S2.** Identification of the potential TetR21 binding motif by MEME<sup>8</sup>. The conserved sequences of binding sites are shown in color. TetR family repressor binding sequences

including: LmrA of *Bacillus subtilis*, QacR of *Staphylococcus aureus*; *tet38* promoter region of *S. aureus* MW2; MtrR of *Neisseria gonorrhoeae*; AcrR of *Escherichia coli*; EthR of *Mycobacterium tuberculosis*. The asterisk indicates the intergenic region between MW2296 and *tetR21* in *S. aureus* MW2. The motif consensus was “AATAGACMMRTHRC”, in particular the underlined “AATAGAC” motif showed strictly conserved.

**Figure S3**

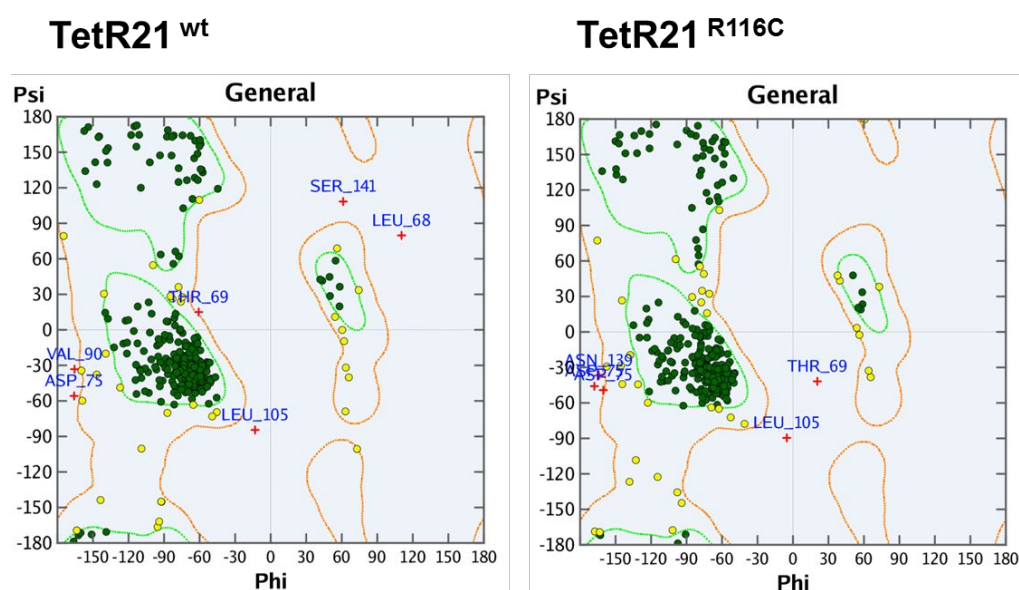

**Figure S3.** Ramachandran plot for TetR21 proteins in homology modeling. Dark green dots represent the residues in favored regions; yellow dots represent the residues in allowed regions; red dots represent the residues in irrational regions.

**Figure S4**

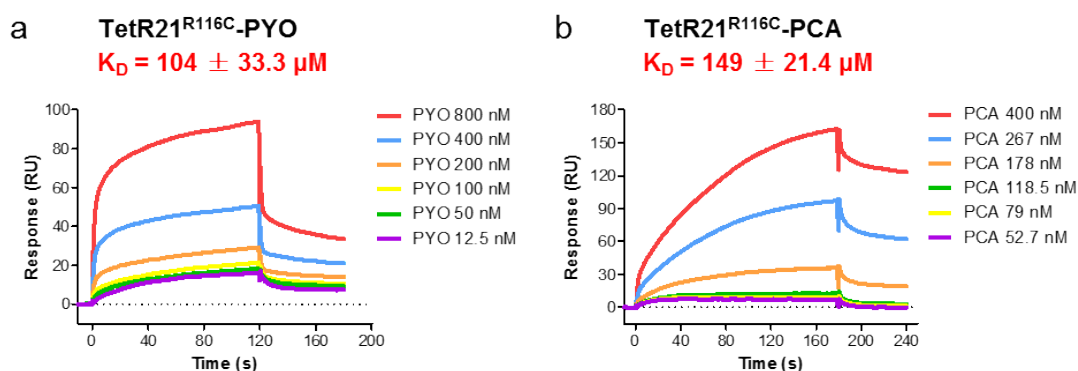

**Figure S4** Surface Plasmon Resonance (SPR) analyses of binding of natural phenazines to TetR21<sup>R116C</sup>. (a) Interactions between pyocyanin (PYO) and TetR21<sup>R116C</sup>. (b) Interactions between phenazine-1-carboxylic acid (PCA) and TetR21<sup>R116C</sup>.

**Figure S5**

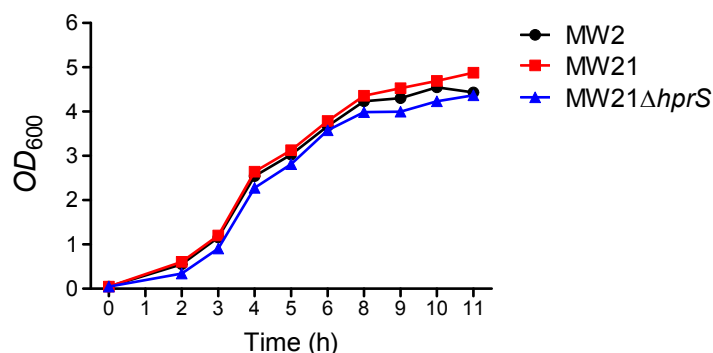

**Figure S5** Growth curves of *S. aureus* strains.

**Figure S6**

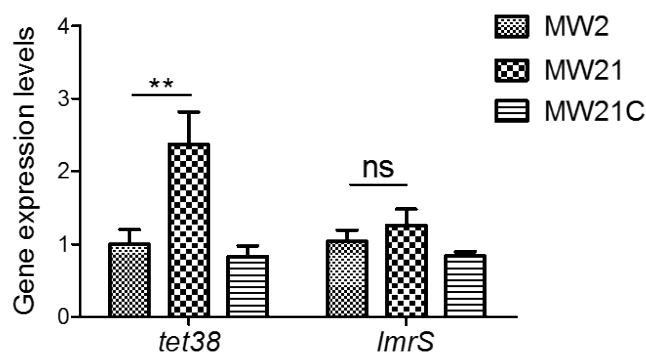

**Figure S6** Quantitative PCR determination of the expression levels of *tet38* and *lmrS* genes in wild-type MRSA MW2, MW2 containing point mutation R116C in *tetR21* (MW21), and MW21 carrying the complementary plasmid pCN51-*tetR21* (MW21C). \*\*,  $P < 0.01$ , ns, non-significant.

## Reference

- (1). Xiaolei, P.; Yuanyuan, D.; Zheng, F.; Chang, L.; Bin, X.; Jing, S.; Fang, B.; Yongxin, J.; Zhihui, C.; Shouguang, J., In vivo host environment alters *Pseudomonas aeruginosa* susceptibility to aminoglycoside antibiotics. *Front Cell Infect Microbiol.* **2017**, *7*, 83.
- (2). Peleg, A. Y.; Miyakis, S.; Ward, D. V.; Earl, A. M.; Rubio, A.; Cameron, D. R.; Pillai, S.; Moellering, R. C., Jr.; Eliopoulos, G. M., Whole genome characterization of the mechanisms of daptomycin resistance in clinical and laboratory derived isolates of *Staphylococcus aureus*. *PloS One.* **2012**, *7* (1), e28316.
- (3). Houck, P. W.; Nelson, J. D.; Kay, J. L., Fatal septicemia due to *Staphylococcus aureus* 502A. Report of a case and review of the infectious complications of bacterial interference programs. *Am J Dis Child.* **1972**, *123* (1), 45-8.
- (4). Cafiso, V.; Bertuccio, T.; Spina, D.; Purrello, S.; Campanile, F.; Di Pietro, C.; Purrello, M.; Stefani, S., Modulating activity of vancomycin and daptomycin on the expression of autolysis cell-wall turnover and membrane charge genes in hVISA and VISA strains. *PloS One.* **2012**, *7* (1), e29573.
- (5). Cameron, D. R.; Ramette, A.; Prazak, J.; Entenza, J.; Haenggi, M.; Que, Y. A.; Resch, G., Draft Genome Sequence of Methicillin-Resistant *Staphylococcus aureus* Strain AW7, Isolated from a Patient with Bacteremia.

*Microbiol Resour Announc.* **2019**, 8 (40), e00806-19.

(6). Zhang, Y., I-TASSER server for protein 3D structure prediction. *BMC bioinformatics.* **2008**, 9, 40.

(7). Roy, A.; Kucukural, A.; Zhang, Y., I-TASSER: a unified platform for automated protein structure and function prediction. *Nat Protoc.* **2010**, 5 (4), 725-38.

(8). Bailey, T. L.; Elkan, C., Fitting a mixture model by expectation maximization to discover motifs in biopolymers. *Proceedings. Proc Int Conf Intell Syst Mol Biol.* **1994**, 2, 28-36.
